# Supplementary material
Source: publisher figshare collection journal article supplement (https://adisjournals.figshare.com/articles/dataset/_/11806605)
Supplement: Supplementary file 1 [file 1]

## *Why carry out this study?*

- The lanreotide autogel/depot (LAN) new syringe was developed in collaboration with patients, caregivers and healthcare professionals to ensure it met their needs, and a validation study has confirmed that it can be used effectively and safely.
  - Human Factors engineering represents a new sector of syringe designing as well as the recognised need to focus on improving the injection experience by engaging with those who use the syringes during the design process.
- In order to test a new delivery system, it should be assessed in an environment that simulates a real injection.
- The LAN new syringe is now approved for use in several countries. The aim of the present study (PRESTO) was to assess the preferences of nurses between the LAN new syringe and the current octreotide long-acting release (LAR) syringe after performing simulated injections.

This summary slide represents the opinions of the authors. This study was funded by Ipsen. Medical writing assistance for this study was provided by Jacqueline Harte and Helen Marshall of Watermeadow Medical, an Ashfield company. For a full list of acknowledgments and disclosures for all authors of this article, please see the full text online. © The authors, CC-BY-NC 2020.

## *What was learned from the study?*

- In this study, almost all nurses (97.8%) reported a preference for the LAN new prefilled/ready-to-use syringe compared with the current octreotide LAR syringe.
- The syringe attribute ranked most important to nurses was ‘confidence that the syringe will not be clogged’.
- The results of the PRESTO study suggest that the LAN new syringe may improve user experience compared with existing products when used in clinical practice.

This summary slide represents the opinions of the authors. This study was funded by Ipsen. Medical writing assistance for this study was provided by Jacqueline Harte and Helen Marshall of Watermeadow Medical, an Ashfield company. For a full list of acknowledgments and disclosures for all authors of this article, please see the full text online. © The authors, CC-BY-NC 2020.
